# Supplementary material
Source: publisher figshare collection journal article supplement (https://acs.figshare.com/ndownloader/files/8804800)
Supplement: Supplementary file 1 [file 8804800]

# Supporting Information

## Superelastic Pseudocapacitors from Freestanding MnO<sub>2</sub>-Decorated Graphene-Coated Carbon Nanotube Aerogels

Yepin Zhao, Maxwell P. Li, Siyuan Liu, and Mohammad F. Islam<sup>\*</sup>

Department of Materials Science and Engineering, Carnegie Mellon University, 5000 Forbes  
Avenue, Pittsburgh, Pennsylvania 15213-3815, United States

E-mail: mohammad@cmu.edu. Phone: (412) 268-8999. Fax: (412) 268-7596

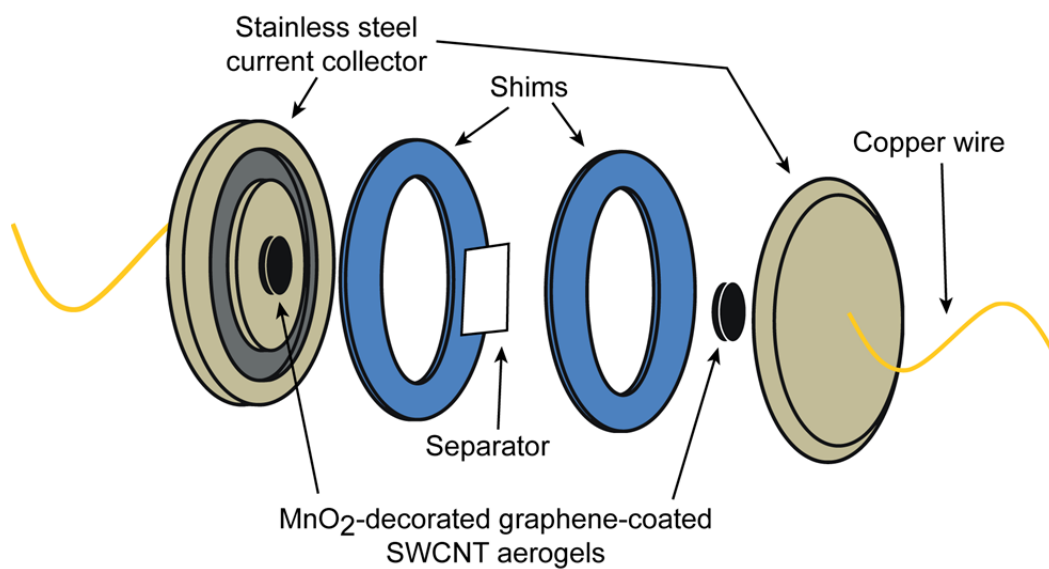

**Figure S1.** A schematic of a home-built parallel-plate electrochemical testing setup. Compressive strain on the electrodes was adjusted by adding and removing shims from the cell.

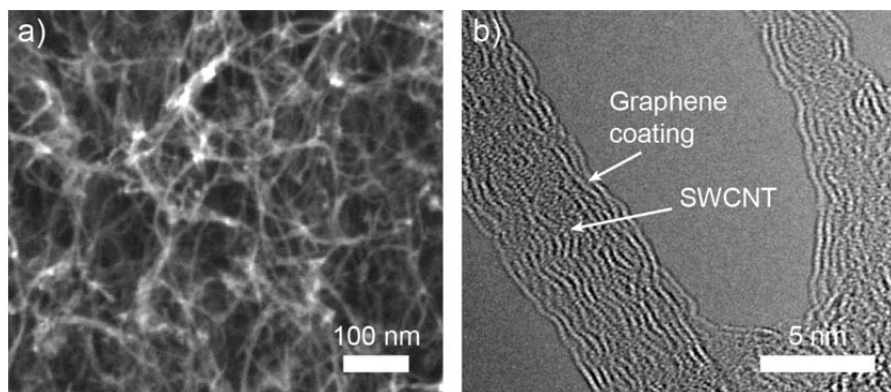

**Figure S2.** (a) SEM and (b) high-resolution TEM images of a cross-section of graphene-coated SWCNT aerogels show an open porous network with two to five layers of graphene coating on the junctions between SWCNTs and the struts.<sup>1-5</sup>

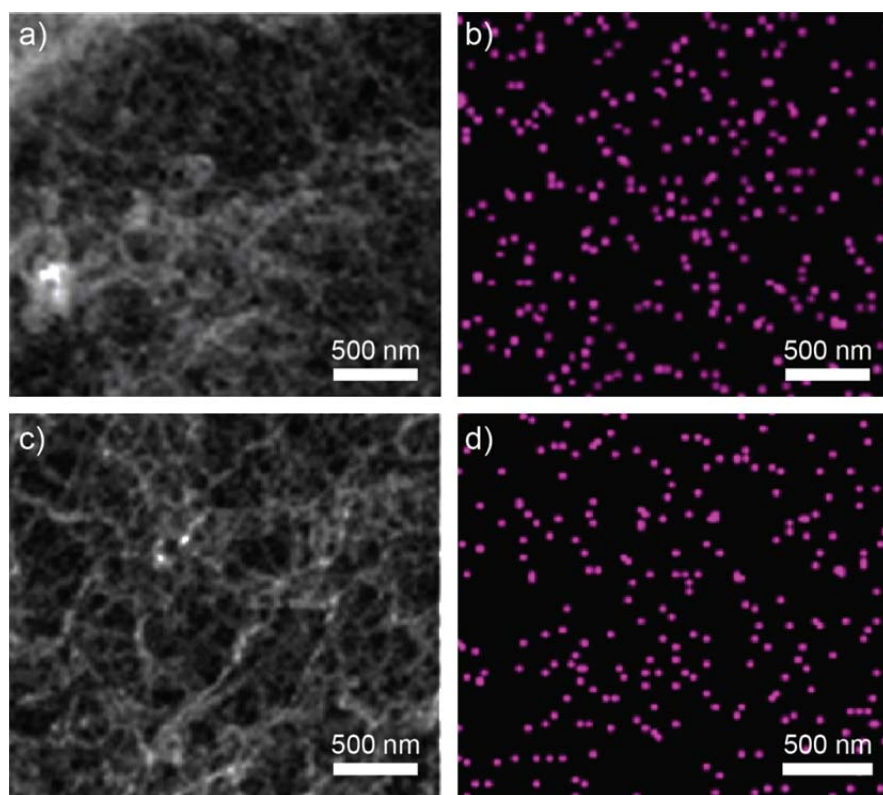

**Figure S3.** SEM images (a, c) and corresponding EDS mapping of Mn (b, d) at the surfaces (a, b) and the interior (c, d) of MnO<sub>2</sub>-decorated graphene-coated SWCNT aerogels after 10 000 charge–discharge cycles.

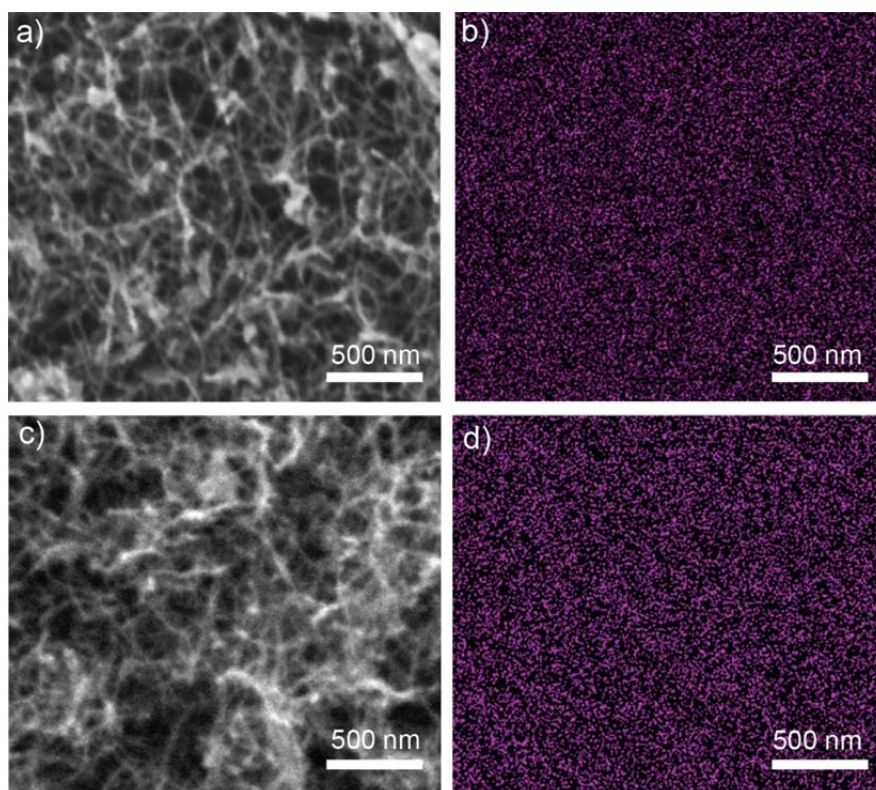

**Figure S4.** SEM images (a, c) and corresponding EDS mapping of Mn (b, d) at the surfaces (a, b) and the interior (c, d) of MnO<sub>2</sub>-decorated graphene-coated SWCNT aerogels after 10 000 compression–release cycles but before any charge–discharge cycles.

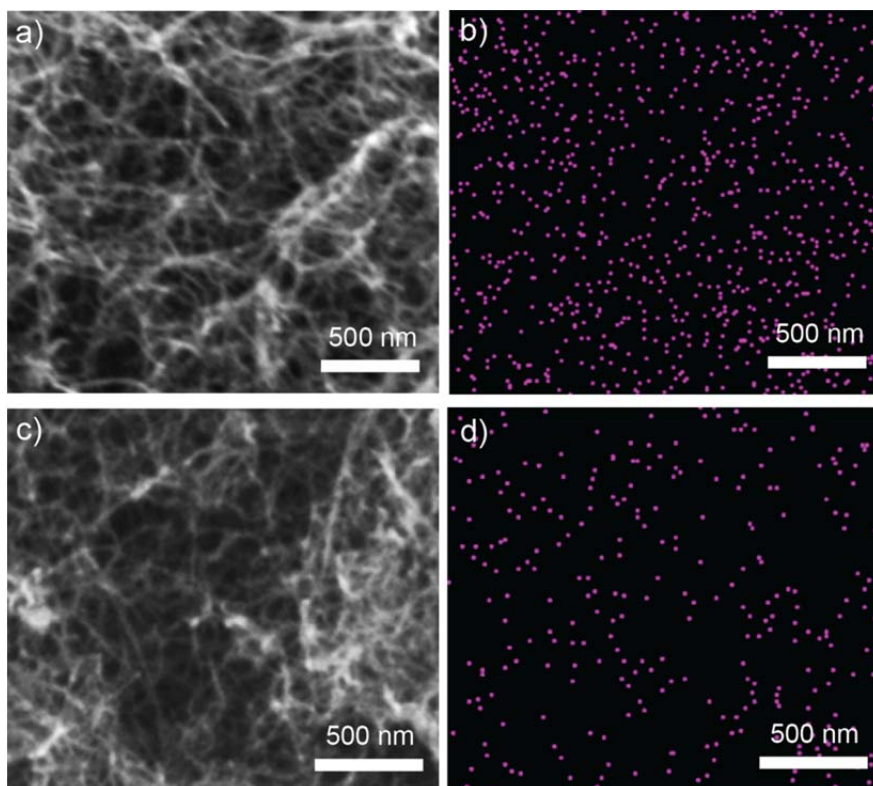

**Figure S5.** SEM images (a, c) and corresponding EDS mapping of Mn (b, d) at the surfaces (a, b) and the interior (c, d) of MnO<sub>2</sub>-decorated graphene-coated SWCNT aerogels after 10 000 compression–release and subsequent 10 000 charge–discharge cycles.

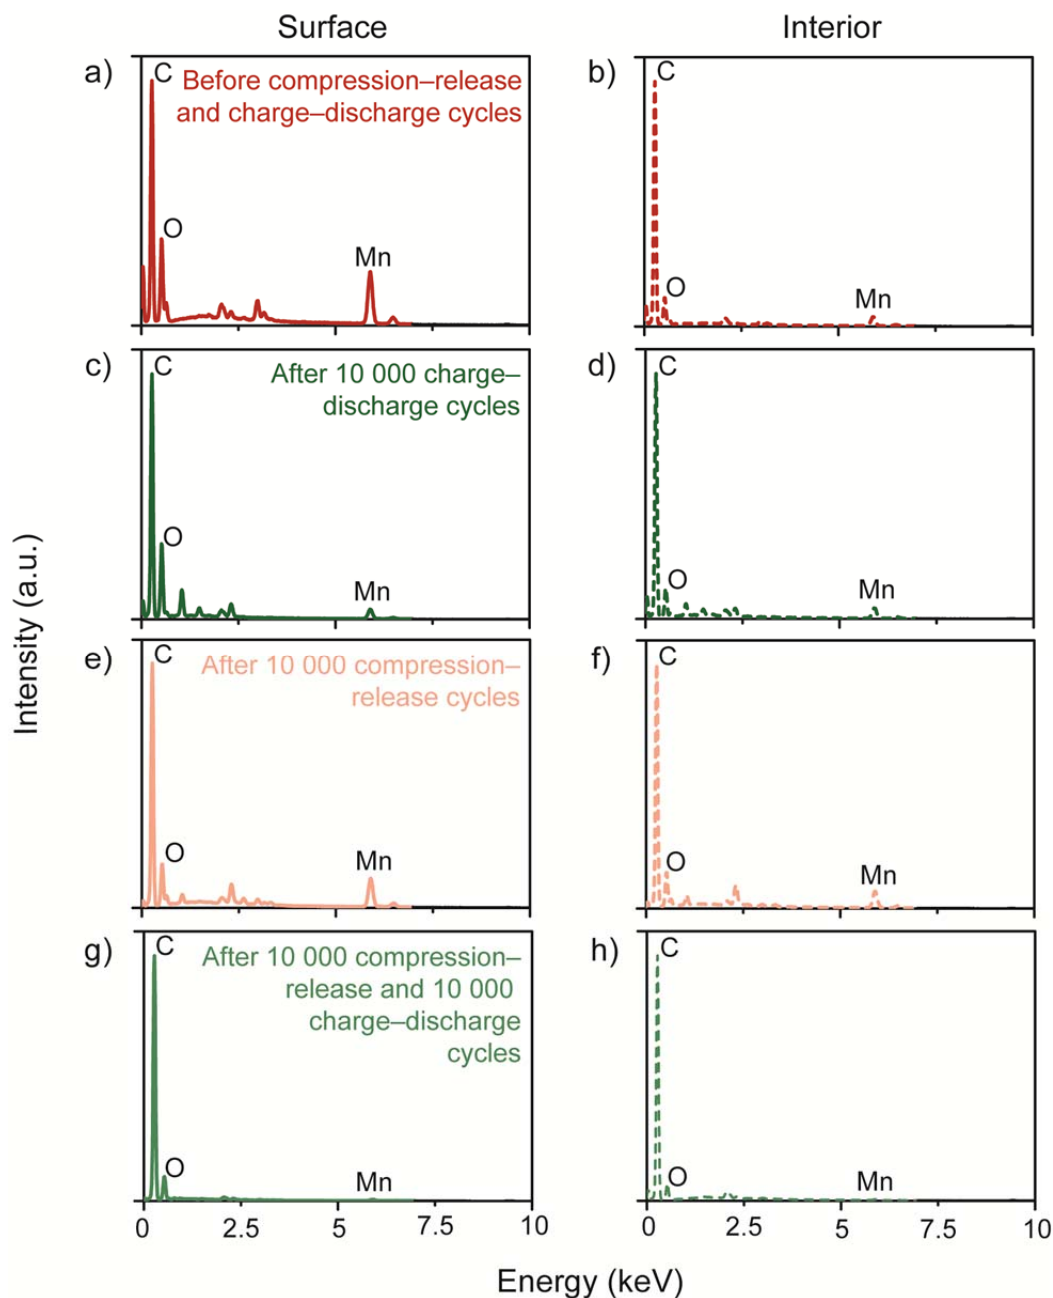

**Figure S6.** EDS spectra from  $\text{MnO}_2$ -decorated graphene-coated SWCNT aerogels (a, b) before any compression-release and charge-discharge cycles, (c, d) after 10 000 charge-discharge cycles, (e, f) after 10 000 compression-release cycles, and (g, h) after 10 000 compression-release and subsequent 10 000 charge-discharge cycles. Samples were examined at the surfaces (a, c, e, and g) and the interior (b, d, f, and h).  $\text{MnO}_2$  weight percentages were from weight percentages of carbon and manganese detected in EDS spectra and also accounting for the oxygen in  $\text{MnO}_2$ .

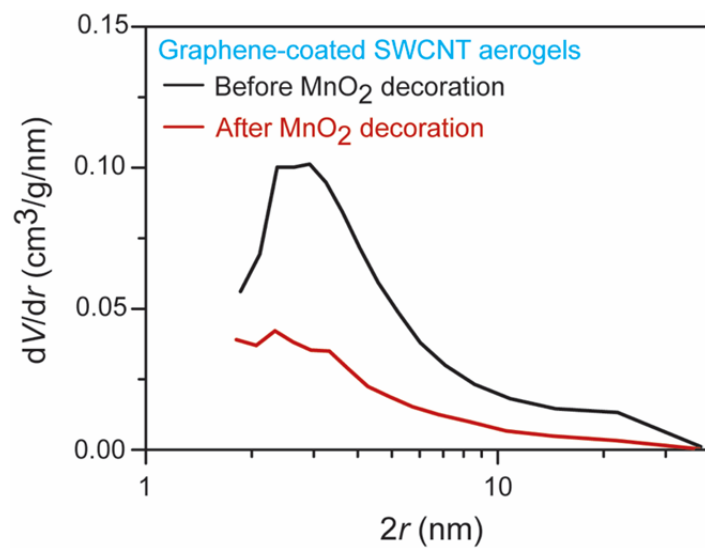

**Figure S7.** The pore diameter distribution of graphene-coated SWCNT aerogels before and after  $\text{MnO}_2$  decoration using the desorption branch of the isotherm and the BJH analysis. A majority of the pores is between 2–40 nm in diameter for both types of aerogels.



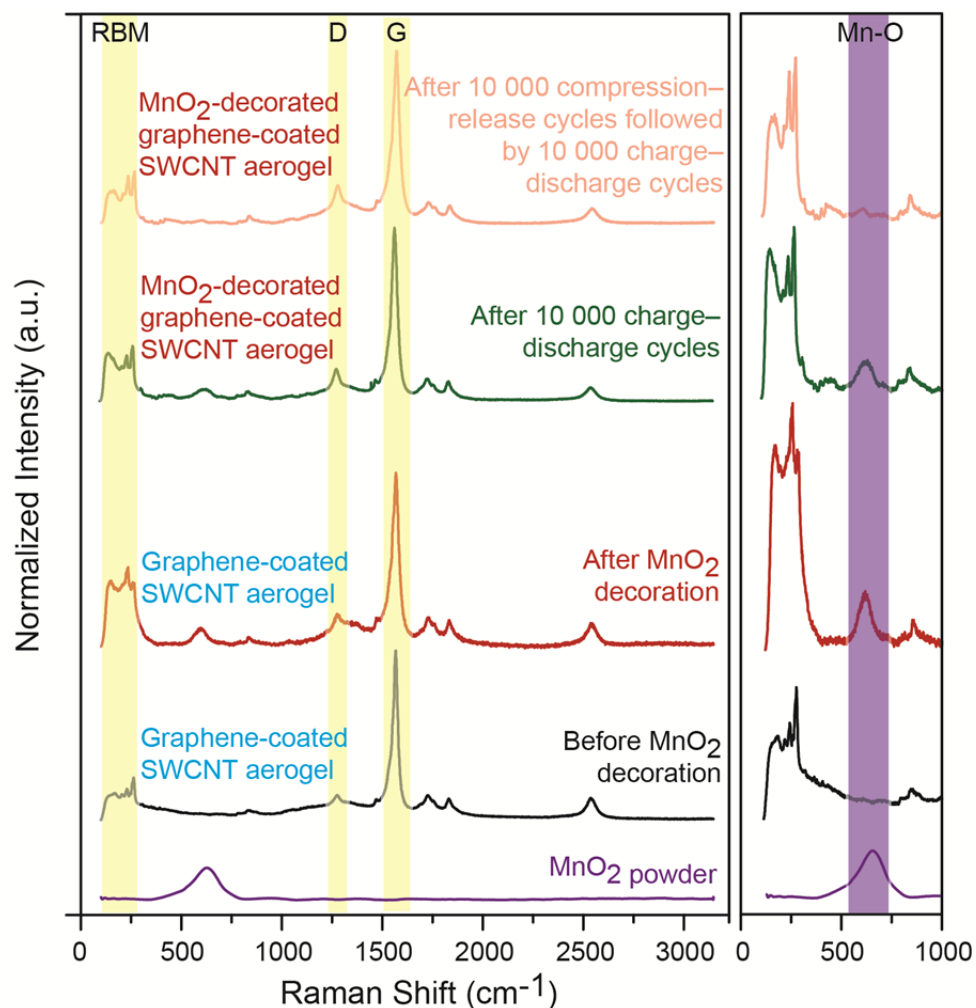

**Figure S8.** Raman spectra from graphene-coated SWCNT aerogels before and after MnO<sub>2</sub> decoration as well as MnO<sub>2</sub>-decorated graphene-coated SWCNT aerogels after 10 000 charge-discharge cycles and after 10 000 compression-release cycles followed by 10 000 charge-discharge cycles. Each spectrum is normalized by the intensity of the G-band of the SWCNTs at  $\sim 1590 \text{ cm}^{-1}$ .

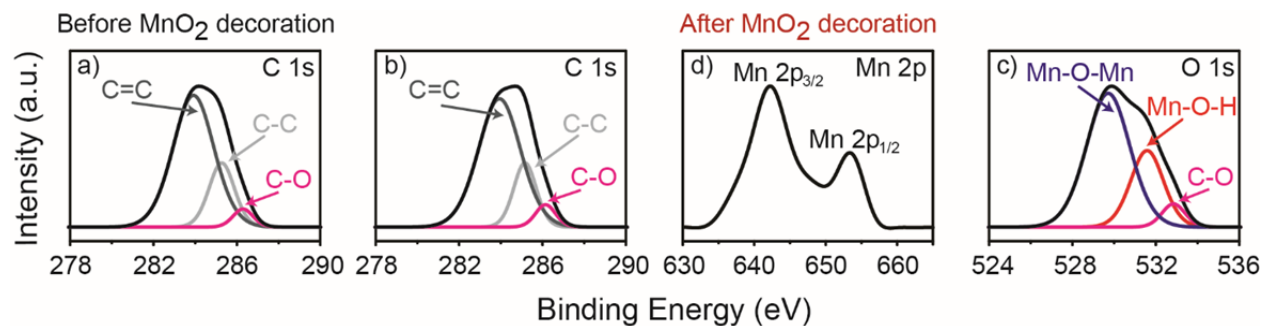

**Figure S9.** XPS spectra from graphene-coated SWCNT aerogels (a) before and (b, d) after MnO<sub>2</sub> decoration. C 1s spectra (a) before and (b) after MnO<sub>2</sub> deposition. (c) Mn 2p and (d) O 1s spectra after MnO<sub>2</sub> deposition.

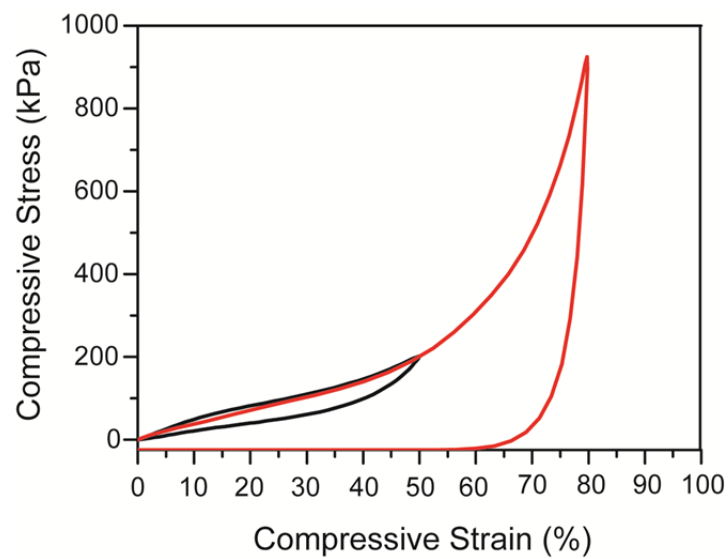

**Figure S10.** Compressive stress vs compressive strain curves of MnO<sub>2</sub>-decorated graphene-coated SWCNT aerogels. The aerogels display 48% plastic deformation when compressed to 80% strain, whereas compression to 50% strain does not induce any plastic deformation.

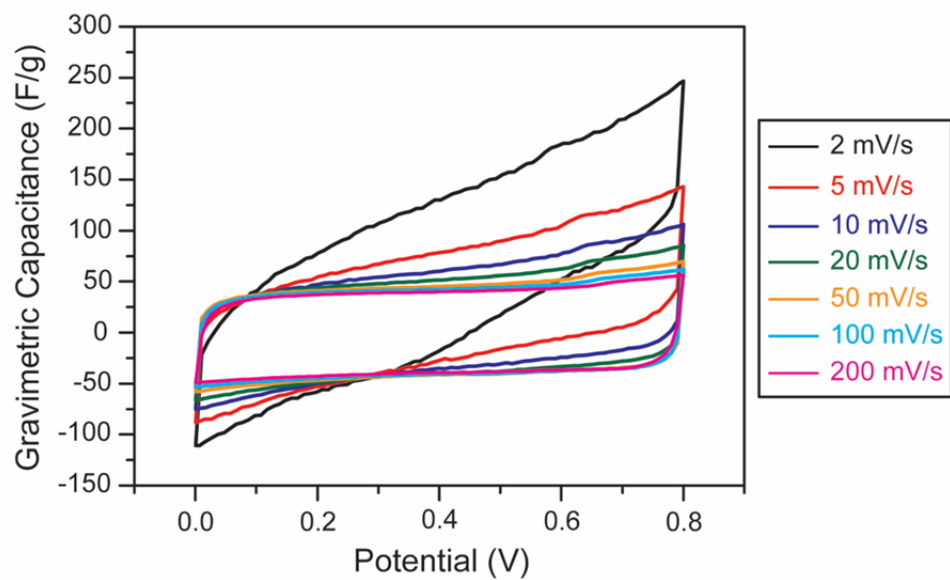

**Figure S11.** Cyclic voltammograms of  $\text{MnO}_2$ -decorated graphene-coated SWCNT aerogels before compression at scan rates from 2–200 mV/s.

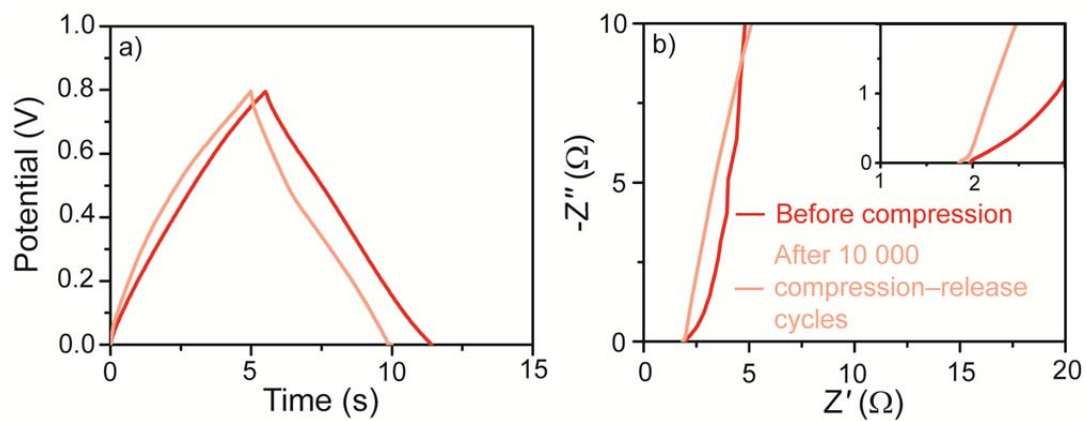

**Figure S12.** Electrochemical performance of MnO<sub>2</sub>-decorated graphene-coated SWCNT aerogels before compression and after 10 000 compression–release cycles. (a) Representative galvanostatic charge–discharge curves at 1 A/g and (b) Nyquist plots depict near identical performance even after being subjected to vigorous mechanical deformation.

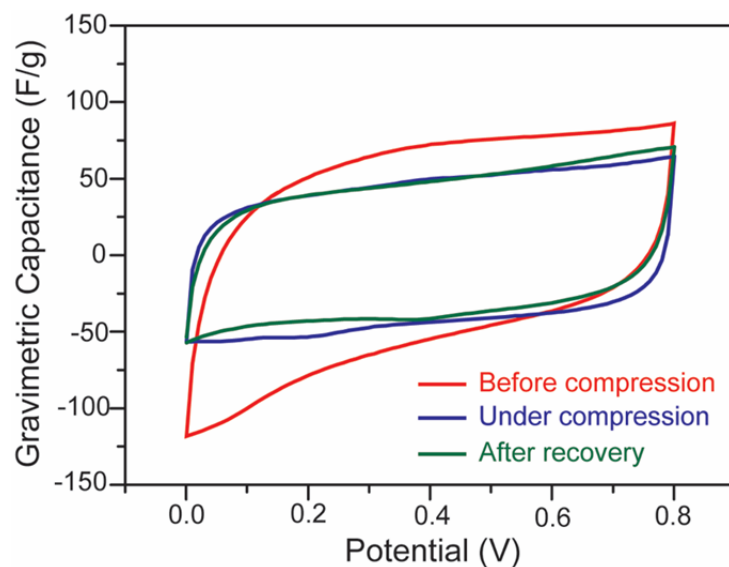

**Figure S13.** Cyclic voltammograms of  $\text{MnO}_2$ -decorated graphene-coated SWCNT aerogels with greater  $\text{MnO}_2$  loading (33 wt%) before, under, and after recovery from 50% compression at a scan rate of 100 mV/s. The electrodes exhibit nearly identical gravimetric capacitances under compression and after recovery from compression to 50% strain. However, gravimetric capacitance of the aerogels is slightly larger before compression.

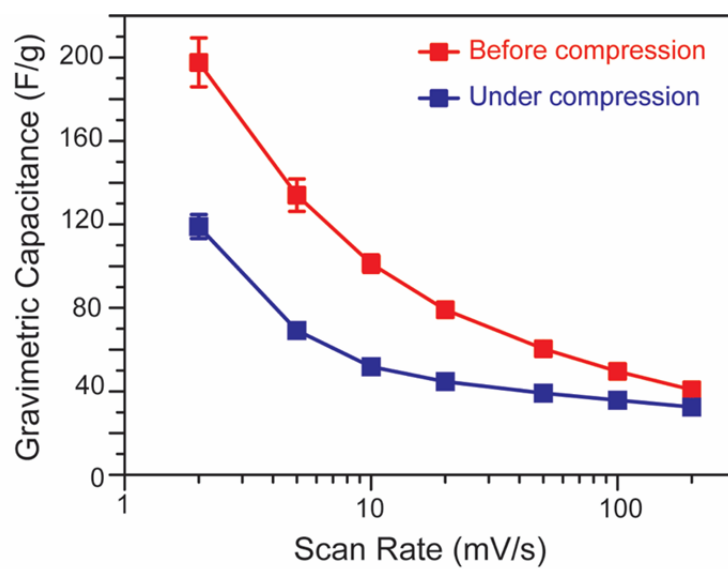

**Figure S14.** Gravimetric capacitances of MnO<sub>2</sub>-decorated graphene-coated SWCNT aerogels with 33 wt% MnO<sub>2</sub> loading before and under 50% compression over a scan rate of 2–200 mV/s.

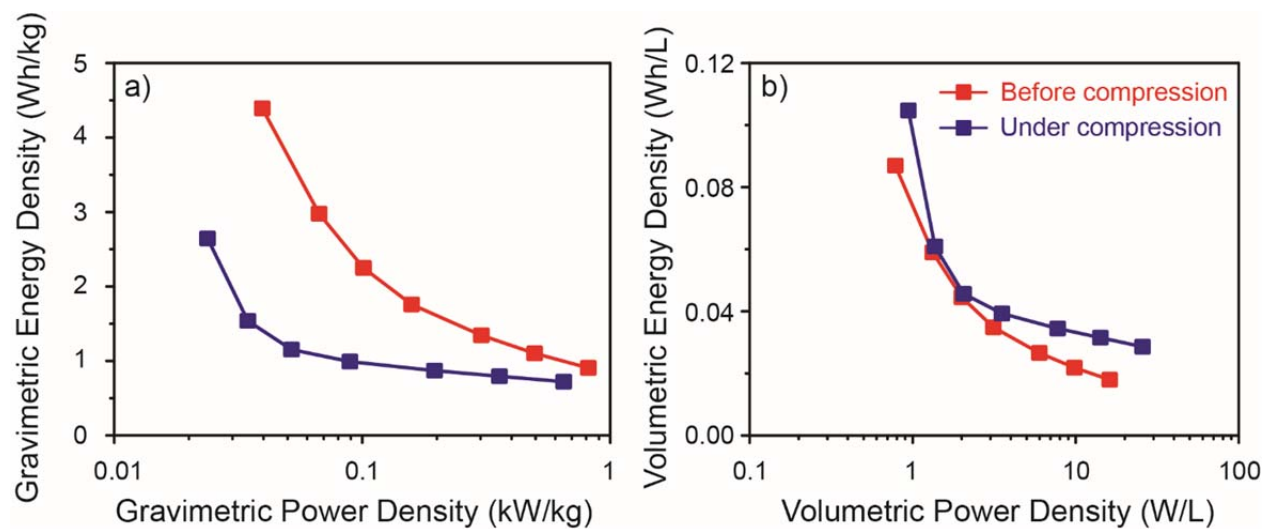

**Figure S15.** (a) Gravimetric and (b) volumetric energy versus power densities for MnO<sub>2</sub>-decorated graphene-coated SWCNT aerogels with 33 wt% MnO<sub>2</sub> loading before and under 50% compression.



**Table S1. Comparison of compressible pseudocapacitors**

| pseudocapacitive material                | capacitance before compression     | maximum compressive strain (%) | capacitance under maximum compression | capacitance after recovery from maximum compression | number of compression–release cycles; strain (%) | reference |
|------------------------------------------|------------------------------------|--------------------------------|---------------------------------------|-----------------------------------------------------|--------------------------------------------------|-----------|
| MnO <sub>2</sub>                         | 98 F/g<br>1.5 F/cm <sup>3</sup>    | 50                             | 106 F/g<br>3.3 F/cm <sup>3</sup>      | 128 F/g<br>2.0 F/cm <sup>3</sup>                    | 10 000; 50                                       | this work |
| Polypyrrole and MnO <sub>2</sub>         | 320 F/g<br>9 F/cm <sup>3</sup>     | 50                             | 293 F/g<br>16 F/cm <sup>3</sup>       | N/A                                                 | N/A                                              | ref 6     |
| Polypyrrole                              | 310 F/g<br>9.8 F/cm <sup>3</sup>   | 50                             | 288 F/g<br>18.2 F/cm <sup>3</sup>     | 304 F/g<br>9.6 F/cm <sup>3</sup>                    | 1 000; 50                                        | ref 7     |
| Polypyrrole                              | 360 F/g<br>14 F/cm <sup>3</sup>    | 50                             | 350 F/g<br>27.2 F/cm <sup>3</sup>     | 360 F/g<br>14 F/cm <sup>3</sup>                     | 1 000; 50                                        | ref 8     |
| Polyaniline                              | 216 F/g<br>3.4 F/cm <sup>3</sup>   | 60                             | 209 F/g<br>8.2 F/cm <sup>3</sup>      | 209 F/g<br>3.3 F/cm <sup>3</sup>                    | 100; 60                                          | ref 9     |
| MnO <sub>2</sub>                         | 212 F/g<br>2.2 F/cm <sup>3</sup>   | 80                             | 105.4 F/g<br>6.4 F/cm <sup>3</sup>    | N/A                                                 | N/A                                              | ref 10    |
| Polypyrrole                              | 753.8 F/g<br>1.4 F/cm <sup>3</sup> | 80                             | 592.3 F/g<br>5.5 F/cm <sup>3</sup>    | N/A                                                 | N/A                                              | ref 10    |
| $\alpha$ -Fe <sub>2</sub> O <sub>3</sub> | 296.3 F/g<br>2.8 F/cm <sup>3</sup> | 70                             | 266.7 F/g<br>8.3 F/cm <sup>3</sup>    | 296.3 F/g<br>2.8 F/cm <sup>3</sup>                  | 1 000; 50                                        | ref 11    |

## References

- (1) Kim, K. H.; Oh, Y.; Islam, M. F., Graphene Coating Makes Carbon Nanotube Aerogels Superelastic and Resistant to Fatigue. *Nat. Nanotechnol.* **2012**, 7 (9), 562–566.
- (2) Wilson, E.; Islam, M. F., Ultracompressible, High-Rate Supercapacitors from Graphene-Coated Carbon Nanotube Aerogels. *ACS Appl. Mater. Interfaces* **2015**, 7 (9), 5612–5618.
- (3) Campbell, A. S.; Jose, M. V.; Marx, S.; Cornelius, S.; Koepsel, R. R.; Islam, M. F.; Russell, A. J., Improved Power Density of an Enzymatic Biofuel Cell with Fibrous Supports of High Curvature. *RSC Adv.* **2016**, 6 (12), 10150–10158.
- (4) Tsui, M. N.; Islam, M. F., Creep- and Fatigue-Resistant, Rapid Piezoresistive Responses of Elastomeric Graphene-Coated Carbon Nanotube Aerogels over a Wide Pressure Range. *Nanoscale* **2017**, 9 (3), 1128–1135.
- (5) Kim, K. H.; Tsui, M. N.; Islam, M. F., Graphene-Coated Carbon Nanotube Aerogels Remain Superelastic while Resisting Fatigue and Creep over  $-100$  to  $+500$  °C. *Chem. Mater.* **2017**, 29 (7), 2748–2755.
- (6) Li, P.; Yang, Y.; Shi, E.; Shen, Q.; Shang, Y.; Wu, S.; Wei, J.; Wang, K.; Zhu, H.; Yuan, Q.; Cao, A.; Wu, D., Core-Double-Shell, Carbon Nanotube@Polypyrrole@MnO<sub>2</sub> Sponge as Freestanding, Compressible Supercapacitor Electrode. *ACS Appl. Mater. Interfaces* **2014**, 6 (7), 5228–5234.
- (7) Li, P.; Shi, E.; Yang, Y.; Shang, Y.; Peng, Q.; Wu, S.; Wei, J.; Wang, K.; Zhu, H.; Yuan, Q.; Cao, A.; Wu, D., Carbon Nanotube-Polypyrrole Core-Shell Sponge and its Application as Highly Compressible Supercapacitor Electrode. *Nano Res.* **2014**, 7 (2), 209–218.
- (8) Zhao, Y.; Liu, J.; Hu, Y.; Cheng, H.; Hu, C.; Jiang, C.; Jiang, L.; Cao, A.; Qu, L., Highly Compression-Tolerant Supercapacitor Based on Polypyrrole-Mediated Graphene Foam Electrodes. *Adv. Mater.* **2013**, 25 (4), 591–595.
- (9) Niu, Z.; Zhou, W.; Chen, X.; Chen, J.; Xie, S., Highly Compressible and All-Solid-State Supercapacitors Based on Nanostructured Composite Sponge. *Adv. Mater.* **2015**, 27 (39), 6002–6008.
- (10) Xu, C.; Li, Z.; Yang, C.; Zou, P.; Xie, B.; Lin, Z.; Zhang, Z.; Li, B.; Kang, F.; Wong, C. P., An Ultralong, Highly Oriented Nickel-Nanowire-Array Electrode Scaffold for High-Performance Compressible Pseudocapacitors. *Adv. Mater.* **2016**, 28 (28), 5777–5777.
- (11) Cheng, X.; Gui, X.; Lin, Z.; Zheng, Y.; Liu, M.; Zhan, R.; Zhu, Y.; Tang, Z., Three-Dimensional  $\alpha$ -Fe<sub>2</sub>O<sub>3</sub>/Carbon Nanotube Sponges as Flexible Supercapacitor Electrodes. *J. Mater. Chem. A* **2015**, 3 (42), 20927–20934.
